# Supplementary material for: Structural and mechanistic insights into disease-associated endolysosomal exonucleases PLD3 and PLD4
Source: PubMed Central journal article supplement — bioRxiv. 2023 Nov 20:2023.11.20.567917. Preprint. [Version 1] doi: 10.1101/2023.11.20.567917 (PMC10690185; doi:10.1101/2023.11.20.567917), 2023-11-20
Supplement: media-1.pdf [file media-1.pdf]

# 1 SUPPLEMENTAL INFORMATION

**A**

```

mPLD3 MKPKLMYQELKVPV ---EEPAGELPINEIEAWKAAEKARWVLLVLLAVVFGAINTQ
hPLD3 MKPKLMYQELKVPV ---EEPANELPNEIEAWKAAEKARWVLLVLLAVVFGAINTQ
mPLD4 MKKKKEHPMIRIPIQTAVEVSDWPCSTSH ---D---PHSGLGMVLGMLAVLGLSSVTLI
hPLD4 MKKPLNKAAVAPTW -----PCSMFRPPWD ---REAGTLQVGLAVLWLGSAVALI
*
luminal
mPLD3 LFLWEYGLLHLEFGN -----QRPAFCYDPCCEAVLVESIPEGLEF
hPLD3 LFLWEYGLLHLEFGN -----QRPAFCYDPCCEAVLVESIPEGLEF
mPLD4 LFLWQAGATSTSHRMFPEEVP -----GWSWETLKGDAQQNNSCQLLVESIPELDF
hPLD4 CLLWQVFRPPTPWQKQVQKQVFRSWEHGSSPAWEFLAARQQRDSQLLVESIPELDF
*:*
mPLD3 PNATSNPSTSQAWLGLLAGAHSISDIASFYWLITNNDTHTQEPSAQOQEEVLQQLQALA
hPLD3 PNATGNPSTSQAWLGLLAGAHSISDIASFYWLITNNDTHTQEPSAQOQEEVLRLQQLTALA
mPLD4 AAGSPTAQPLAQAWLGLLDTARESVHIASYWSLTGLDGVNDSRRQGEALLQKQQLL
hPLD4 AAGSPSAQLQAWLGLLDTAQESVHVASYSWLTGPDGVNDSRQGEALLQKQQLL
.: ***** :.:*****:*. :.:*:*:*:*:*
mPLD3 PRGKVRIVAVSKPN GP--LADLQSLQSGAQVRMVDMMQKLTG VLSHTKFWVVDQTFHYLG
hPLD3 PRGKVRIVAVSKPN GPQQAQDLQALQSGAQVRMVDMMQKLTG VLSHTKFWVVDQTFHYLG
mPLD4 LRNISSVAVVTHSPT LAKTSTDLQVLAAGAHRQVFMKQLTGG VLSKFWVVDGRHIYVG
hPLD4 GRNISLAVVTHSPT LAKTSTDLQVLAAGAHRQVFMGRLTRG VLSKFWVVDGRHIYVG
.: :.:*:*:*:*:* ***** :.:*:*:*:*:*
mPLD3 SANMWRSLQVQKELGVVMYNCSCIARDLTKIFEAYWFLGQAGSSIPSTWPRFDTRYNQ
hPLD3 SANMWRSLQVQKELGVVMYNCSCIARDLTKIFEAYWFLGQAGSSIPSTWPRFDTRYNQ
mPLD4 SANMWRSLQVQKELGAILYNCNLAQLEKTFQYVWLGTPQAVLEKTPWRFSSHINR
hPLD4 SANMWRSLQVQKELGAVIYNCNLAQLEKTFQYVWLGTPQAVLEKTPWRFSSHINR
*****:*****:*****:*****:*****:*****:*****:*****:*****
mPLD3 ETPMEICLNGTALAYLASAPPFLCPGRTDPLKALLNVVDSARSFYIYAVMNYLPTME
hPLD3 ETPMEICLNGTALAYLASAPPFLCPGRTDPLKALLNVVDSARSFYIYAVMNYLPTME
mPLD4 FQPLRGPFDFGVTTFAYFSASPPSLCPGRTDPLAVLGVMEGARQFYIYVSMVEYFPTTR
hPLD4 FQPHGLDFDGVTTTFAYFSASPPALCPGRTDLEALLAVMGSAQEFYIYASVMEYFPTTR
*.:*:*:*:*:* ***** :.:*:*:*:*:*
mPLD3 SHPRFWEAIDDDGLRRAAYERGVKVRLLISCWGHSDPSMRSFLSLAALHNDHSDIQV
hPLD3 SHPRFWEAIDDDGLRRAAYERGVKVRLLISCWGHSDPSMRSFLSLAALHNDHSDIQV
mPLD4 THHARYVPLDNLRAAALNKGVRVLLVSCWFNTDPTMFAIRLSLQAFSNPAGISVDV
hPLD4 SHPRYVPLDNLRAAALNKGVRVLLVSCWFNTDPTMFAIRLSLQAFSNPAGISVDV
*:*:*:*:*:* *****:*****:*****:*****:*****:*****:*****:*****
mPLD3 KLFVVPDESQARIP YARVNHKYMVTERASYIGTSNWSGYFTETAGTSLVTVQNGH --
hPLD3 KLFVVPDEAQARIP YARVNHKYMVTERASYIGTSNWSGNFTETAGTSLVTVQNGR --
mPLD4 KVFIVPVGN -HSNIPFRVNHKFMVTEKAYIGTSNWSYDFTETAGVGLVSVQKTPRA
hPLD4 KVFIVPVGN -HSNIPFRVNHKFMVTEKAYIGTSNWSYDFTETAGVGLVSVQKTPRA
*:*:*:*:*:* *****:*****:*****:*****:*****:*****:*****:*****
mPLD3 ---GILRSQLEAVFLRDWESFYSHDIDTSAHSVGNACRLL -
hPLD3 ---GILRSQLEAVFLRDWESFYSHDIDTSAHSVGNACRLL -
mPLD4 QGATTVQEQQLFERDWSHYAMLDQRPV --SQDCVW--
hPLD4 QPAGATVQEQQLFERDWSHYAMLDQRPV --SQDCVWQ
.:*:*:*:*:* *****:*****:*****:*****:*****:*****:*****:*****

```

**B**

|       | mPLD3 | hPLD3 | mPLD4 | hPLD4 |
|-------|-------|-------|-------|-------|
| mPLD3 | 100   | 93.7  | 43.8  | 45.6  |
| hPLD3 | 93.7  | 100   | 43.2  | 44.3  |
| mPLD4 | 43.8  | 43.2  | 100   | 75.9  |
| hPLD4 | 45.6  | 44.3  | 75.9  | 100   |

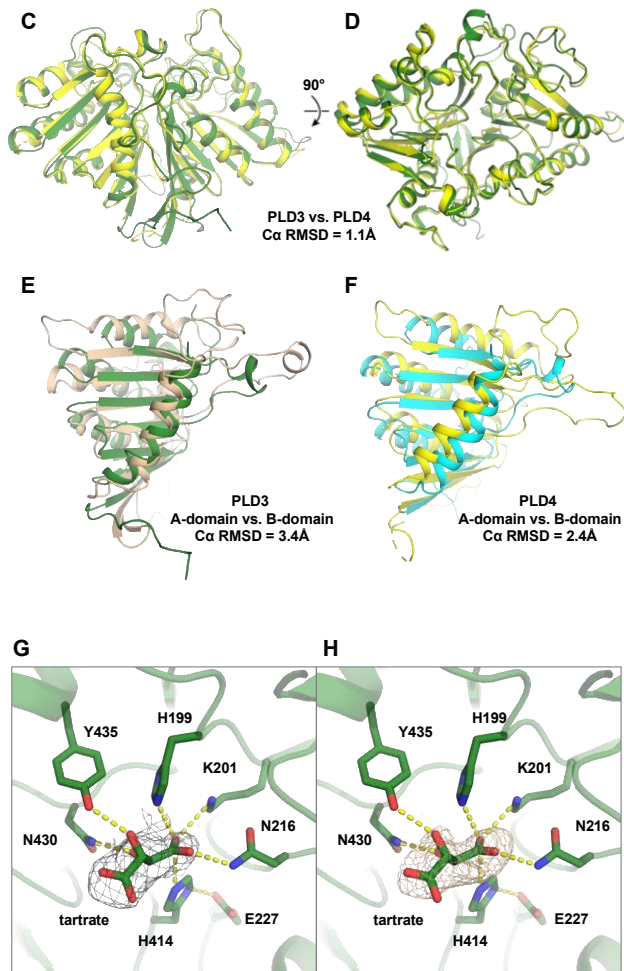

**Figure S1. Sequence and structure comparison of PLD3 and PLD4.** (A) Sequence alignment of PLD3 and PLD4. Mouse PLD3 (Uniprot No.: O35405), human PLD3 (Uniprot No.: Q8IV08), mouse PLD4 (Uniprot No.: Q8BG07), and human PLD4 (Uniprot No.: Q96BZ4). Residues conserved in all aligned PLDs are labeled by an asterisk (\*), while a colon (:), and a period (.) indicate strongly similar and weakly similar sequences, respectively. Residues involved in phosphodiester-bond cleavage are highlighted in blue. Letters shown in red and brown represent residues that interact with the substrate DNA's first nucleotide, and its third nucleotide, respectively. Residue numbers that correspond to mPLD3 and hPLD4 are shown above and below the sequence alignment, respectively. The sequence alignment was performed with Clustal

12 Omega [1]. The luminal region of the PLDs is labeled with a green arrow. **(B)** Percent identity  
13 matrix for the sequence alignment. **(C-D)** Structural alignment between the crystal structures of  
14 **(C)** mPLD3 and **(D)** hPLD4. **(E)** Structural alignment between A-domain and B-domain of mPLD3.  
15 **(F)** Structural alignment between A-domain and B-domain of hPLD4. The structural alignments  
16 were carried out with PyMOL without further refinement cycles. **(G-H)** In the active site of mPLD3,  
17 a tartrate molecule from the crystallization solution was observed. Hydrogen bonds and salt  
18 bridges are represented by yellow dashed lines. **(G)** A  $2F_o-F_c$  electron density map of the tartrate  
19 molecule is represented in a gray mesh contoured at  $0.8\sigma$ . **(H)** An  $F_o-F_c$  unbiased omit electron  
20 density map of the tartrate molecule is represented in a gray mesh contoured at  $2.3\sigma$ .

21

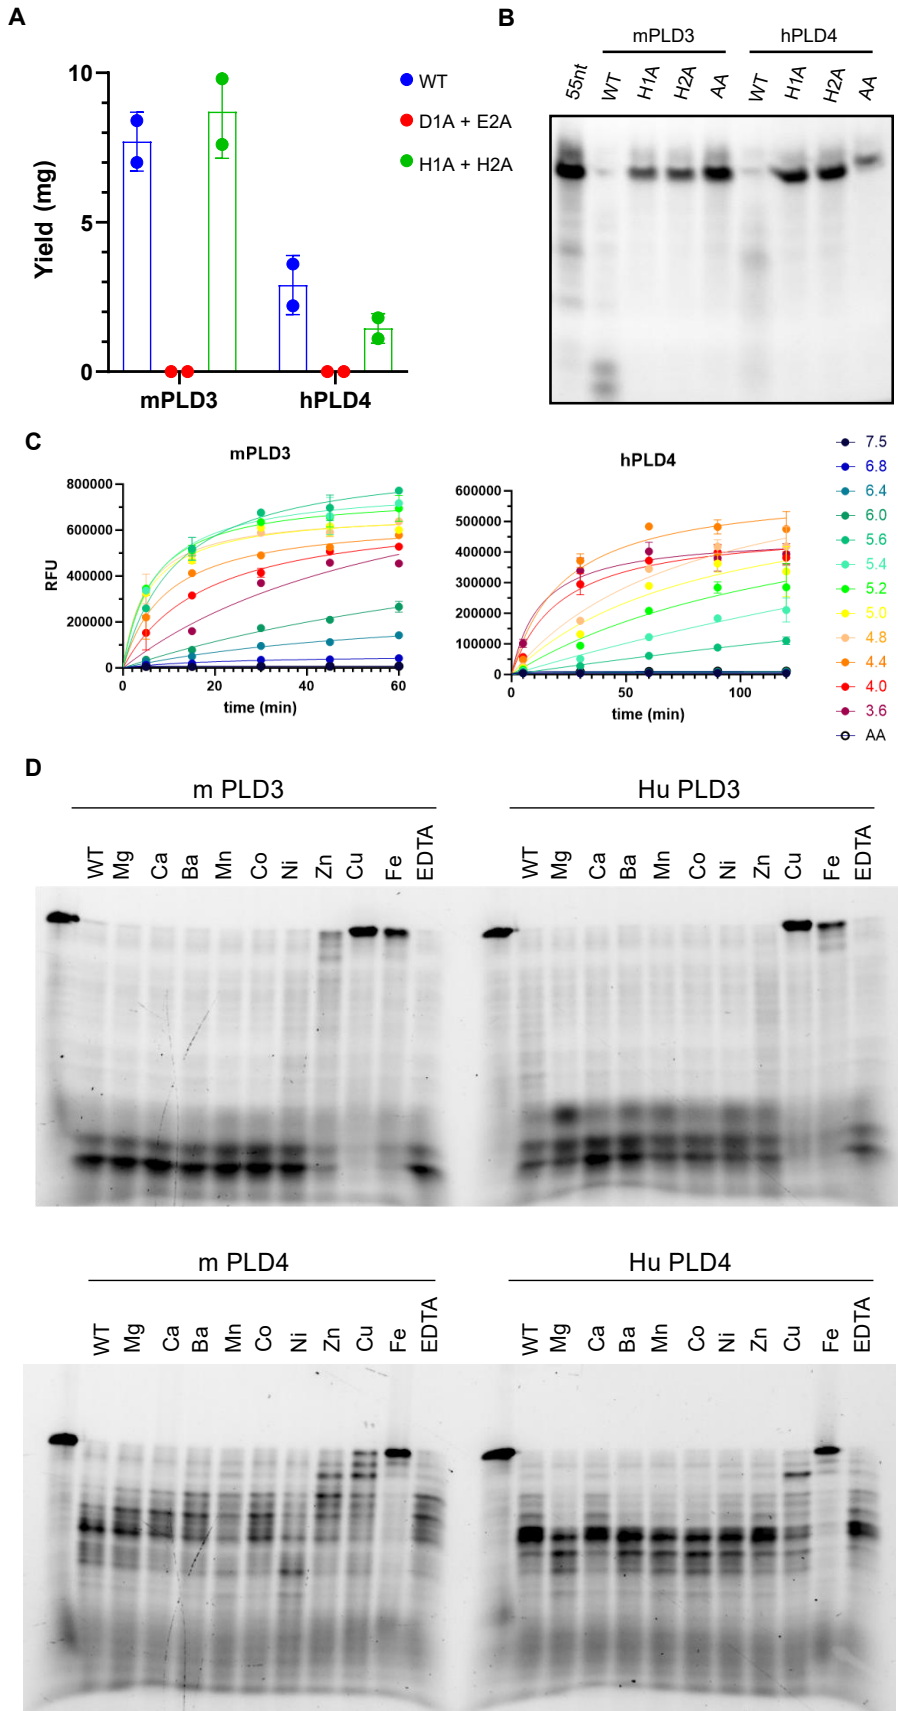

23 **Figure S2. Effects of mutations and cation metals on PLD3 and PLD4. (A)** Expression yield  
24 for recombinant mPLD3 and hPLD4 by Expi293 cells per 30 mL medium. D1A + E2A: D206A +  
25 E421A (mPLD3) or D221A + E435A (hPLD4); H1A + H2A: both catalytic His mutated to Ala. Each  
26 red dot represents a data point. **(B)** Requirement of His residues in HKD motif for the PLD catalytic  
27 activity. H1A: first His was mutated to Ala; H2A: second His to Ala; AA: and both His to Ala.  
28 Reaction condition: 10 nM PLD3 or 100 nM PLD4, 2  $\mu$ M 55nt substrate (55SUB 5'-  
29 TCCATGACGTTCCCTGATGCTAAGTATGCACTTCATCGTCAAGCAATGCTATGCA-3'), reaction  
30 at 37°C for 2 h. **(C)** Exonuclease activity of human PLD4 and PLD3 at different pH values, as  
31 measured by a fluorophore-quencher assay. AA was used as a non-catalytic control. **(D)** Gel  
32 assay showing the inhibition of PLD3 and PLD4 by selected divalent cations. PLD proteins were  
33 dialyzed with 10 mM EDTA overnight, then against 1000-fold volume of PBS to remove any  
34 cations acquired from purification/elution. Reaction conditions were as follows. PLD4: 50 mM in  
35 NaAc buffer, pH 4.4, enzyme:substrate 1:100 (molar), reaction at 37°C for 2 h. PLD3: 50 mM in  
36 MES buffer, pH 5.6, enzyme:substrate 1:40, reaction at 37°C for 1.5 h. In all reactions, 2  $\mu$ M of  
37 55Sub-FAM, and 2 mM of cations or EDTA was used.

38

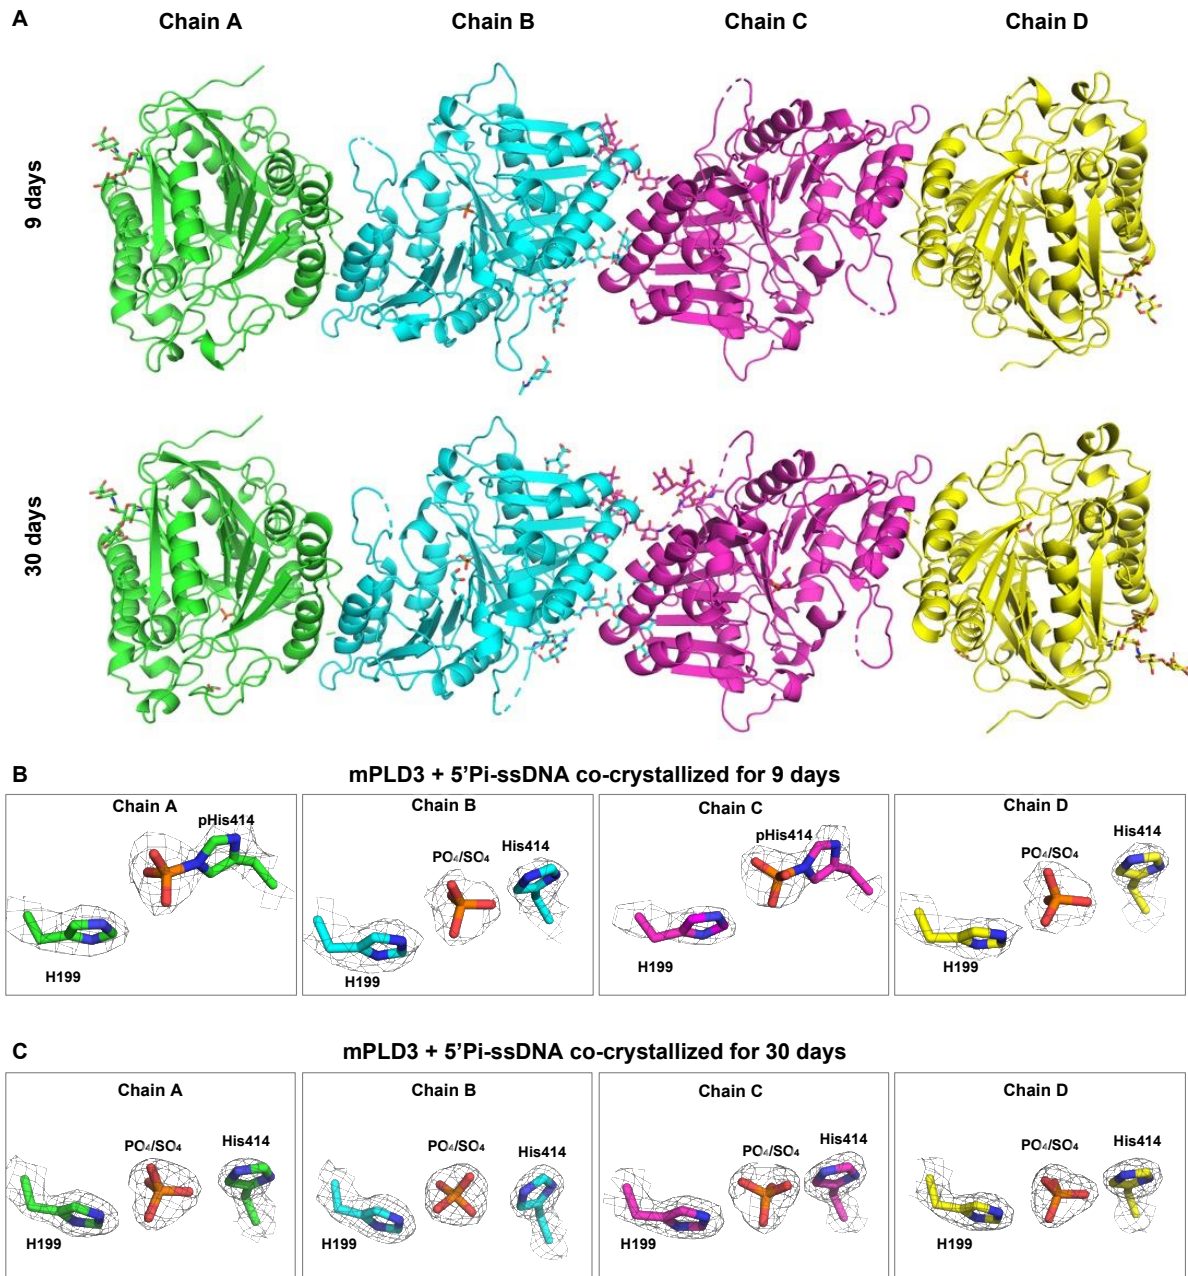

39

40 **Figure S3. Overall and active site structures of mPLD3 co-crystallized with 5'-Pi-ssDNA. (A)**

41 Each asymmetric unit in the structures of mPLD3 co-crystallized with 5'-Pi-ssDNA for 9 and 30

42 days both contain four PLD3 molecules. **(B-C)** Active sites of each chain in the structures of

43 mPLD3 co-crystallized with 5'-Pi-ssDNA for **(B)** 9 days and **(C)** 30 days. The  $2F_o - F_c$  electron

44 density maps are represented in a gray mesh contoured at  $1.5\sigma$ .

45

A

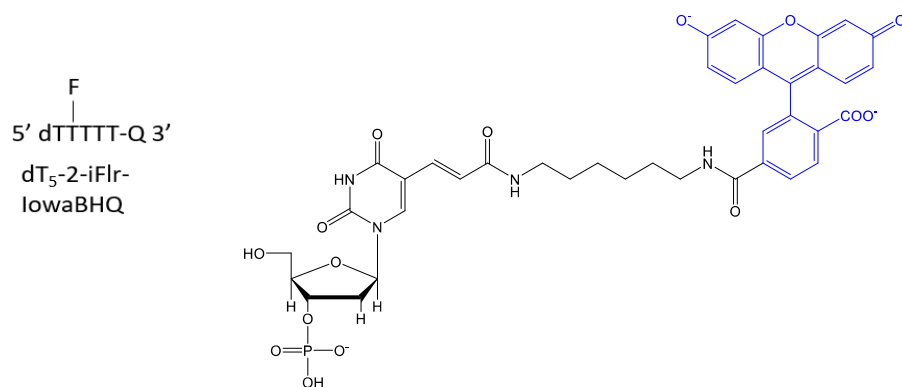

B

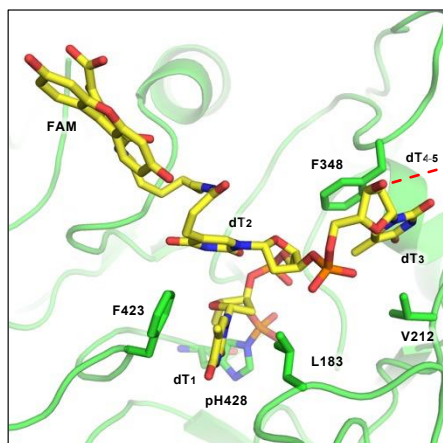

46

47 **Figure S4. Modeled structure of nucleotide-linked fluorescein of the fluorogenic substrate**

48 **in the PLD4 active site. (A)** Chemical structure of the fluorophore-quencher substrate (blue) and

49 details of the thymidine-linked FAM (abbreviated as 'F'). **(B)** A modeled structure of hPLD4 bound

50 to substrate with thymidine-linked FAM. Red dashed lines represents the unmodeled dT<sub>4</sub> and dT<sub>5</sub>.

51

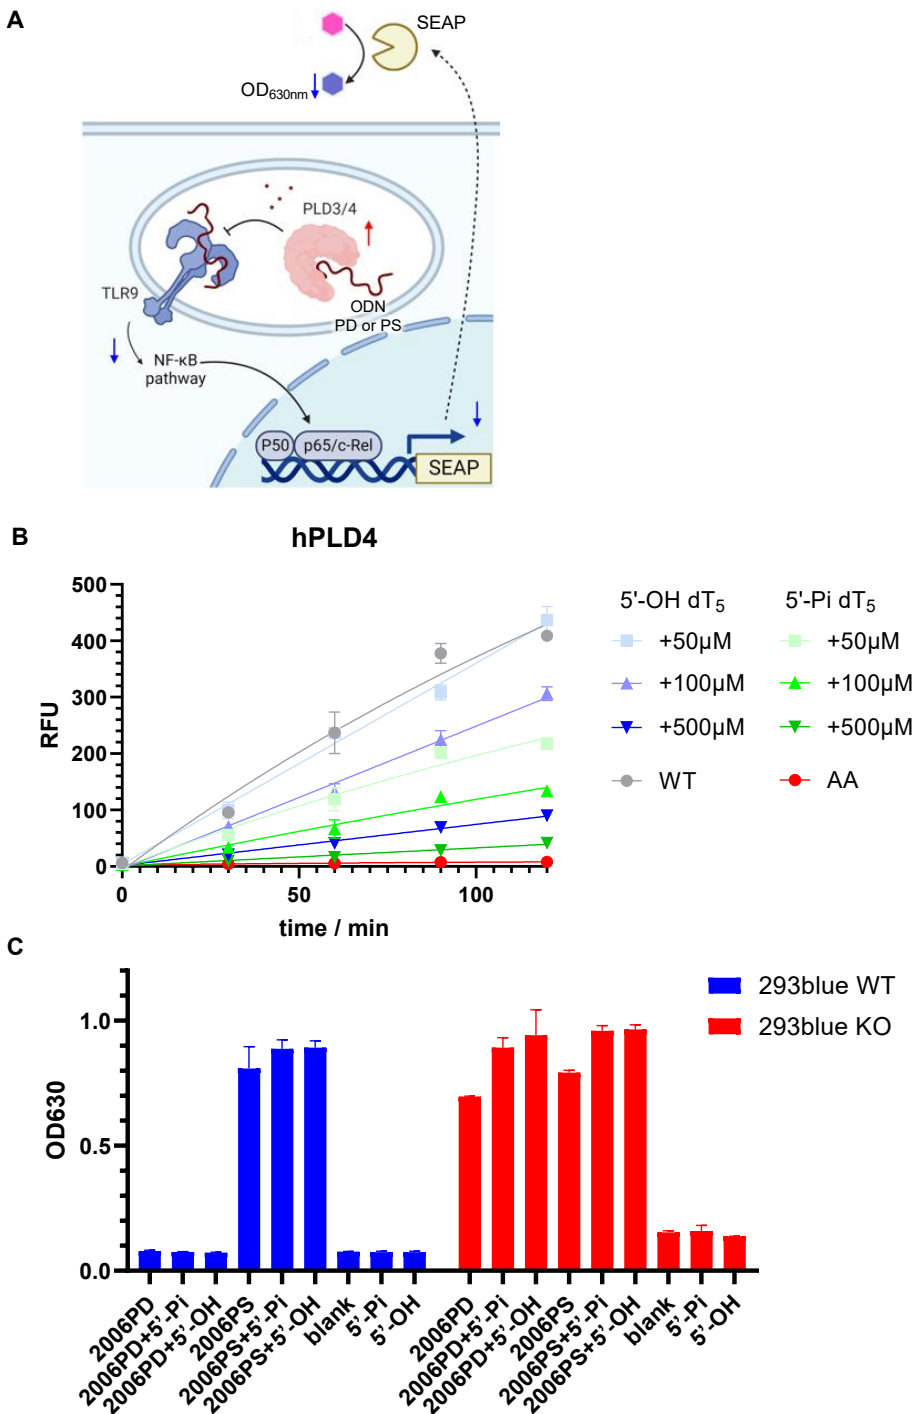

52

53 **Figure S5. Analysis of inhibitory effect of 5'-phosphorylated oligonucleotides in an in vitro**

54 **enzyme assay or bioassay. (A) Scheme of the cell-based assay for PLD3/4 enzyme activity.**

55 **HEK293Blue™ hTLR9 reporter cells can be stimulated by TLR9 agonists (ODNs including**

56 2006PD and 2006PS, represented by brown lines), thereby activating downstream NF- $\kappa$ B  
57 pathway signaling. Secreted embryonic alkaline phosphatase (SEAP) is produced under the  
58 control of NF- $\kappa$ B promoter. SEAP is secreted to supernatant and catalyzes the conversion of a  
59 colorimetric substrate from pink to blue, which can be quantified by absorbance at the wavelength  
60 of 630 nm ( $OD_{630}$ ). The reporter cells with PLD3 knockout (KO) were transfected with PLD3/4 to  
61 digest ssDNA (here 2006PD), thus reducing TLR9-driven NF- $\kappa$ B reporter signaling. The higher  
62 the exonuclease activity (represented by a red up arrow), the less the  $OD_{630}$  will be measured  
63 (blue down arrows). The figure was created by the BioRender software. Details of this assay were  
64 reported in our previous study [2]. **(B)** Analysis of dose-dependent inhibition of PLD4 by either 5'-  
65 Pi-dT<sub>5</sub> or 5'-OH-dT<sub>5</sub>. In brief, 100 nM PLD4 and 2  $\mu$ M iFr-5-dT were mixed in NaAc reaction buffer  
66 in the presence of escalating doses of 5'-Pi-dT<sub>5</sub> or 5'-OH-dT<sub>5</sub>. The reactions were quenched at  
67 different time points with 1 M Tris, and the fluorescent signal was measured. **(C)** Cell experiment  
68 showing excess 5'-Pi-dT<sub>5</sub> was unable to inhibit PLD3 activity as measured by HEK293Blue™  
69 hTLR9 reporter cell line. The cells (WT or PLD3 KO) were stimulated with 1  $\mu$ M 2006PD in the  
70 presence of 1 mM 5'-OH-dT<sub>5</sub> or 5'-Pi-dT<sub>5</sub>. No significant inhibition of WT PLD3 activity was  
71 observed. PLD4 efficiently digested oligonucleotide substrates that contains phosphodiester (PD)  
72 linkages but not phosphorothioate linkages (PS). 5'-OH = 5'-OH-dT<sub>5</sub>; 5'-Pi = 5'-Pi-dT<sub>5</sub>.  
73



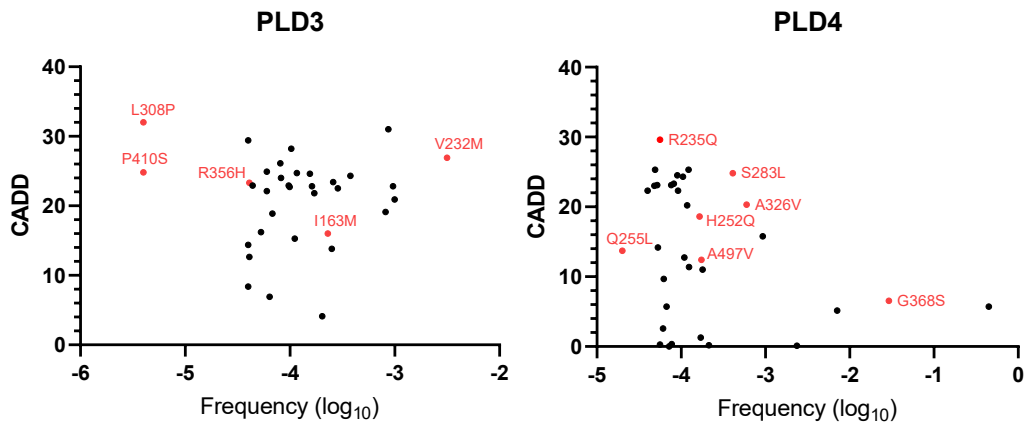

74  
75  
76  
77  
78  
79

**Figure S6. Scatter plots of PLD3 and PLD4 disease-associated mutants.** Variant data were obtained from <https://hgidsoft.rockefeller.edu/PopViz/>. The plot indicates the selected missense mutations analyzed in this study (red). Y axis: CADD, Combined Annotation-Dependent Depletion. X axis: allele frequency.

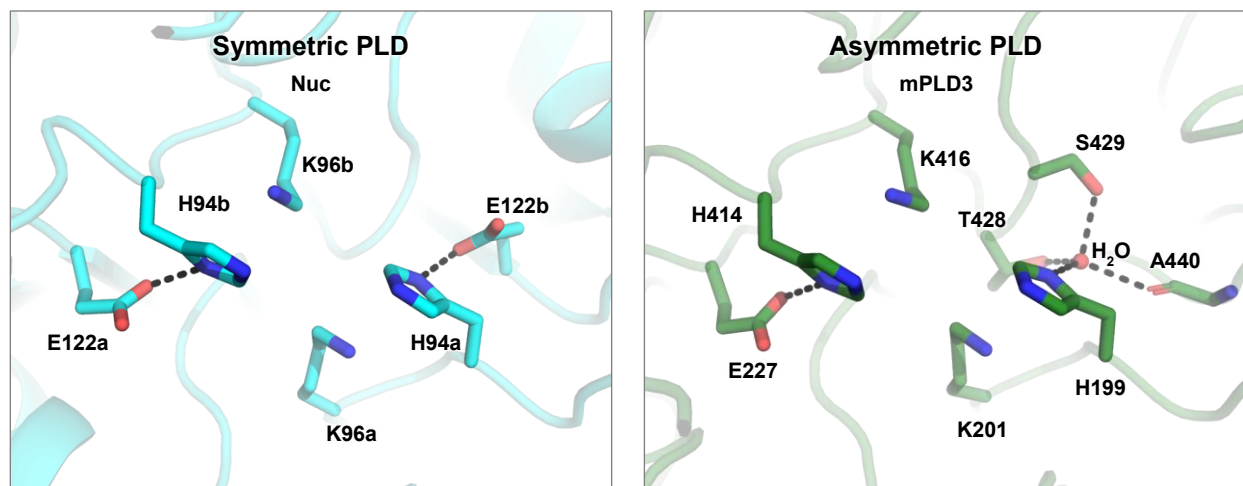

80

81 **Figure S7. Structural comparison of the active sites of symmetrical and asymmetrical PLDs.**

82 Crystal structure of a phospholipase D family member, Nuc from *Salmonella typhimurium* (PDB  
 83 1BYS), is used to represent symmetrical PLDs. Crystal structure of mPLD3 without nucleic acid  
 84 substrate from this study is used to represent asymmetrical (or pseudosymmetrical) PLDs. Hydrogen  
 85 bonds and salt bridges are represented by black dashed lines. Nuc is an interchain dimer where  
 86 the residues in the first chain are labeled as 'a' and those in the second chain as 'b'. mPLD3 is  
 87 an intrachain dimer, where all residues are labeled sequentially.

88

89 **Table S1. X-ray data collection and refinement statistics**

| <b>Data collection</b>                                               |                          |                                                       |                                                        |                                                        |
|----------------------------------------------------------------------|--------------------------|-------------------------------------------------------|--------------------------------------------------------|--------------------------------------------------------|
|                                                                      | mPLD3 apo                | mPLD3+5'Pi-(dT) <sub>5</sub><br>(9 days) <sup>a</sup> | mPLD3+5'Pi-(dT) <sub>5</sub><br>(30 days) <sup>a</sup> | hPLD4+5'Pi-(dT) <sub>5</sub><br>(14 days) <sup>a</sup> |
| Beamline                                                             | APS23ID-D                | APS23ID-D                                             | APS23ID-B                                              | APS23ID-D                                              |
| Wavelength (Å)                                                       | 1.0332                   | 1.0332                                                | 1.0332                                                 | 1.0332                                                 |
| Space group                                                          | P 3 <sub>2</sub> 2 1     | P 1                                                   | P 1                                                    | P 3 <sub>1</sub> 2 1                                   |
| Unit cell parameters                                                 |                          |                                                       |                                                        |                                                        |
| a, b, c (Å)                                                          | 94.2, 94.2, 109.4        | 54.2, 54.2, 202.8                                     | 54.5, 54.8, 203.6                                      | 89.0, 89.0, 274.0                                      |
| α, β, γ (°)                                                          | 90, 90, 120              | 96.6, 89.2, 90.1                                      | 83.7, 89.1, 89.9                                       | 90, 90, 120                                            |
| Resolution (Å) <sup>b</sup>                                          | 50.0-2.08<br>(2.12-2.08) | 50.0-2.75<br>(2.80-2.75)                              | 50.0-2.00<br>(2.03-2.00)                               | 50.0-3.00<br>(3.05-3.00)                               |
| Unique reflections <sup>b</sup>                                      | 34,128 (3,344)           | 57,208 (2,215)                                        | 131,976 (10,415)                                       | 26,067 (2,549)                                         |
| Redundancy <sup>b</sup>                                              | 18.7 (13.0)              | 3.0 (1.9)                                             | 2.3 (1.9)                                              | 18.3 (13.7)                                            |
| Completeness (%) <sup>b</sup>                                        | 100 (99.8)               | 95.5 (75.9)                                           | 83.1 (69.3)                                            | 99.8 (99.5)                                            |
| <I/σ <sub>I</sub> > <sup>b</sup>                                     | 36.9 (2.1)               | 11.9 (2.1)                                            | 11.3 (1.0)                                             | 27.9 (1.0)                                             |
| R <sub>sym</sub> <sup>c</sup> (%) <sup>b</sup>                       | 6.9 (64.4)               | 12.1 (42.4)                                           | 9.1 (70.1)                                             | 9.6 (41.8)                                             |
| R <sub>pim</sub> (%) <sup>b</sup>                                    | 1.6 (17.6)               | 8.0 (34.0)                                            | 6.9 (58.7)                                             | 2.3 (45.9)                                             |
| CC <sub>1/2</sub> <sup>d</sup> (%) <sup>b</sup>                      | 99.2 (94.0)              | 96.7 (59.2)                                           | 95.6 (52.9)                                            | 99.6 (63.9)                                            |
| <b>Refinement statistics</b>                                         |                          |                                                       |                                                        |                                                        |
| Resolution (Å)                                                       | 45.4-2.08                | 48.0-2.75                                             | 37.1-2.00                                              | 44.7-3.00                                              |
| Reflections (work)                                                   | 34,105                   | 57,195                                                | 131,924                                                | 26,067                                                 |
| Reflections (test)                                                   | 1,679                    | 4,069                                                 | 6,468                                                  | 2,549                                                  |
| R <sub>cryst</sub> <sup>e</sup> / R <sub>free</sub> <sup>f</sup> (%) | 20.6/24.2                | 25.4/29.3                                             | 22.4/26.4                                              | 26.3/31.4                                              |
| No. non-H atoms                                                      | 3,747                    | 13,353                                                | 13,744                                                 | 6,286                                                  |
| Macromolecules <sup>g</sup>                                          | 3,515                    | 13,158                                                | 13,125                                                 | 6,172                                                  |
| Ligands <sup>h</sup>                                                 | 26                       | 10                                                    | 72                                                     | 114                                                    |
| Solvent                                                              | 199                      | 185                                                   | 553                                                    | 0                                                      |
| Average B-values (Å <sup>2</sup> )                                   | 54                       | 44                                                    | 40                                                     | 122                                                    |
| Macromolecules <sup>g</sup>                                          | 55                       | 44                                                    | 40                                                     | 121                                                    |
| Ligands <sup>h</sup>                                                 | 63                       | 40                                                    | 48                                                     | 178                                                    |
| Solvent                                                              | 49                       | 34                                                    | 39                                                     | N/A                                                    |
| Wilson B-value (Å <sup>2</sup> )                                     | 39                       | 37                                                    | 33                                                     | 110                                                    |
| <b>RMSD from ideal geometry</b>                                      |                          |                                                       |                                                        |                                                        |
| Bond length (Å)                                                      | 0.003                    | 0.003                                                 | 0.017                                                  | 0.005                                                  |
| Bond angle (°)                                                       | 0.65                     | 0.65                                                  | 1.8                                                    | 1.0                                                    |
| <b>Ramachandran statistics (%)</b>                                   |                          |                                                       |                                                        |                                                        |
| Favored                                                              | 96.2                     | 96.7                                                  | 96.9                                                   | 92.6                                                   |
| Outliers                                                             | 0.00                     | 0.00                                                  | 0.25                                                   | 0.26                                                   |
| <b>PDB code</b>                                                      | 8V05                     | 8V06                                                  | 8V07                                                   | 8V08                                                   |

90 <sup>a</sup> The reaction in the crystal was allowed to proceed for different times before mounting and cryoprotection.91 <sup>b</sup> Numbers in parentheses refer to the highest resolution shell.92 <sup>c</sup>  $R_{sym} = \frac{\sum_{hkl} \sum_i |I_{hkl,i} - \langle I_{hkl} \rangle|}{\sum_{hkl} \sum_i I_{hkl,i}}$  and  $R_{pim} = \frac{\sum_{hkl} (1/(n-1))^{1/2} \sum_i |I_{hkl,i} - \langle I_{hkl} \rangle|}{\sum_{hkl} \sum_i I_{hkl,i}}$ , where  $I_{hkl,i}$  is the scaled  
93 intensity of the  $i^{\text{th}}$  measurement of reflection  $h, k, l$ ,  $\langle I_{hkl} \rangle$  is the average intensity for that reflection, and  $n$  is the  
94 redundancy.95 <sup>d</sup>  $CC_{1/2}$  = Pearson correlation coefficient between two random half datasets.96 <sup>e</sup>  $R_{cryst} = \frac{\sum_{hkl} |F_o - F_c|}{\sum_{hkl} |F_o|} \times 100$ , where  $F_o$  and  $F_c$  are the observed and calculated structure factors, respectively.97 <sup>f</sup>  $R_{free}$  was calculated as for  $R_{cryst}$ , but on a test set comprising 5-10% of the data excluded from refinement.98 <sup>g</sup> Macromolecule atoms include protein and N-glycans.99 <sup>h</sup> Ligands include nucleotides, PO<sub>4</sub>, glycerol, ethylene glycol, acetate, tartrate, and citrate.

100 **Table S2. Protein stability prediction of PLD3 mutants**

|             | ddG (Kcal/mol) |
|-------------|----------------|
| mPLD3-L306P | -1.46          |
| mPLD3-I163M | -1.37          |
| mPLD3-V230M | -0.86          |

101

102 Protein stability was predicted by I-Mutant Suite [3].

103 ddG Value:

104  $dG(\text{mutant}) - dG(\text{WildType})$  in kcal/mole

105 Binary Classification:

106 ddG<0: Decrease Stability

107 ddG>0: Increase Stability

108 Ternary Classification:

109 ddG<-0.5: Large Decrease of Stability

110 ddG>0.5: Large Increase of Stability

111  $-0.5 \leq ddG \leq 0.5$ : Neutral Stability

112

113 **Supplemental References**

- 114 1. Sievers, F.; Wilm, A.; Dineen, D.; Gibson, T.J.; Karplus, K.; Li, W.; Lopez, R.; McWilliam, H.;  
115 Remmert, M.; Soding, J.; et al. Fast, scalable generation of high-quality protein multiple  
116 sequence alignments using Clustal Omega. *Mol Syst Biol* **2011**, *7*, 539,  
117 doi:10.1038/msb.2011.75.
- 118 2. Gavin, A.L.; Huang, D.; Huber, C.; Martensson, A.; Tardif, V.; Skog, P.D.; Blane, T.R.;  
119 Thinnes, T.C.; Osborn, K.; Chong, H.S.; et al. PLD3 and PLD4 are single-stranded acid  
120 exonucleases that regulate endosomal nucleic-acid sensing. *Nat Immunol* **2018**, *19*, 942-  
121 953, doi:10.1038/s41590-018-0179-y.
- 122 3. Capriotti, E.; Fariselli, P.; Casadio, R. I-Mutant2.0: predicting stability changes upon  
123 mutation from the protein sequence or structure. *Nucleic Acids Res* **2005**, *33*, W306-310,  
124 doi:10.1093/nar/gki375.
- 125
